# Supplementary material for: Tri-functional molecular relay to fabricate size-controlled CoOx nanoparticles and WO3 photoanode for an efficient photoelectrochemical water oxidation
Source: Royal Society of Chemistry journal article supplement (doi:10.1039/d0cy00483a), 2020-01-01
Supplement: d0cy00483a1.pdf [file d0cy00483a1.pdf]

## Supplementary Information

### **A Tri-Functional Molecular Relay to Fabricate a Size-controlled CoO<sub>x</sub> Nanoparticles & WO<sub>3</sub> Photoanode for Efficient Photoelectrochemical Water Oxidation**

*Gui-Lin Hu,<sup>a</sup> Rong Hu,<sup>a</sup> Zhi-Hong Liu,<sup>a</sup> Kai Wang,<sup>b</sup> Xiang-Yang Yan,<sup>a</sup> and Hong-Yan Wang<sup>a\*</sup>*

<sup>a</sup>Key Laboratory for macromolecular Science of Shaanxi Province, School of Chemistry and Chemical Engineering, Shaanxi Normal University, Xi'an, 710119, P. R. China.

<sup>b</sup>Scientific Research and Academic Office, Air Force Logistics College, Xuzhou, 221000, P. R. China.

Email: hongyan-wang@snnu.edu.cn;

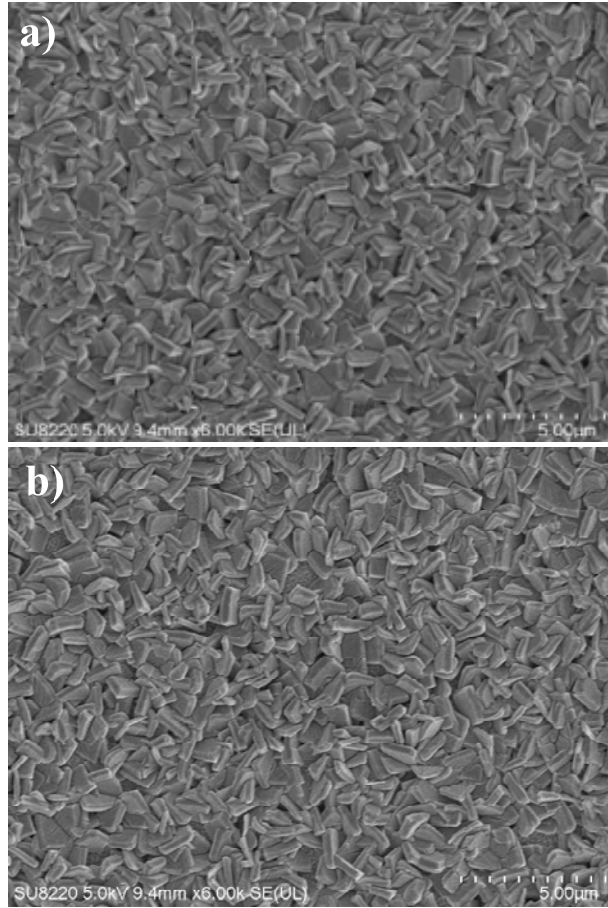

Figure S1. SEM of the bare  $\text{WO}_3$  and  $\text{C-M2P-CoO}_x/\text{WO}_3$  electrode.

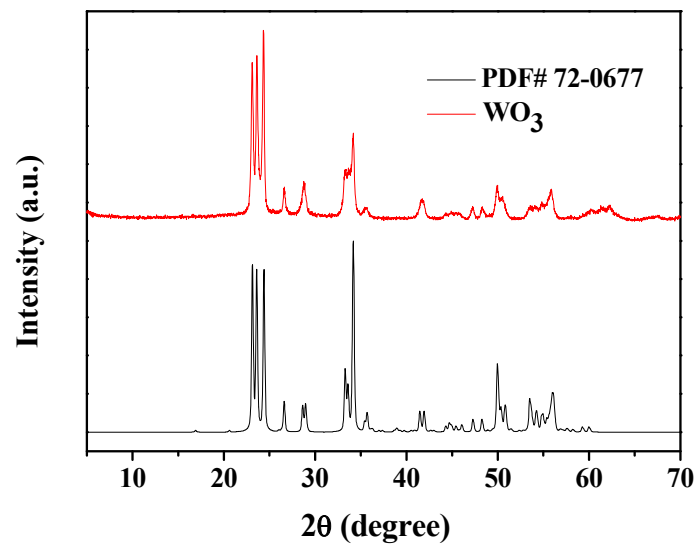

Figure S2. XRD of the bare WO<sub>3</sub>.

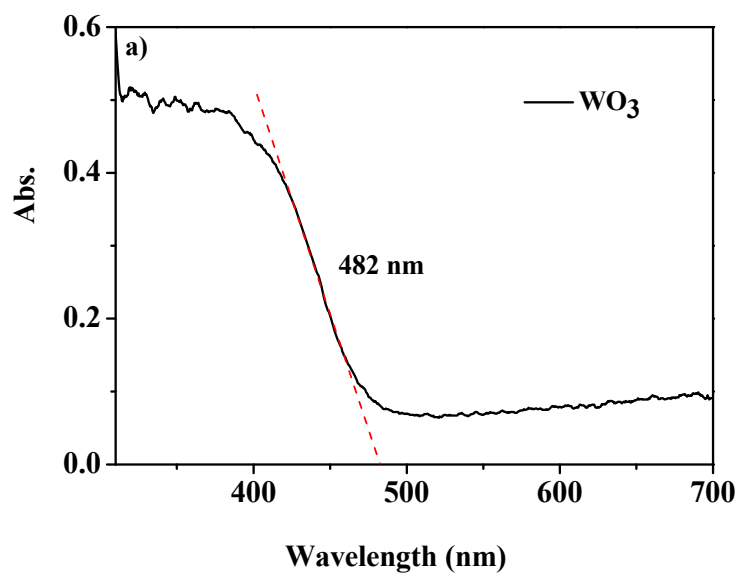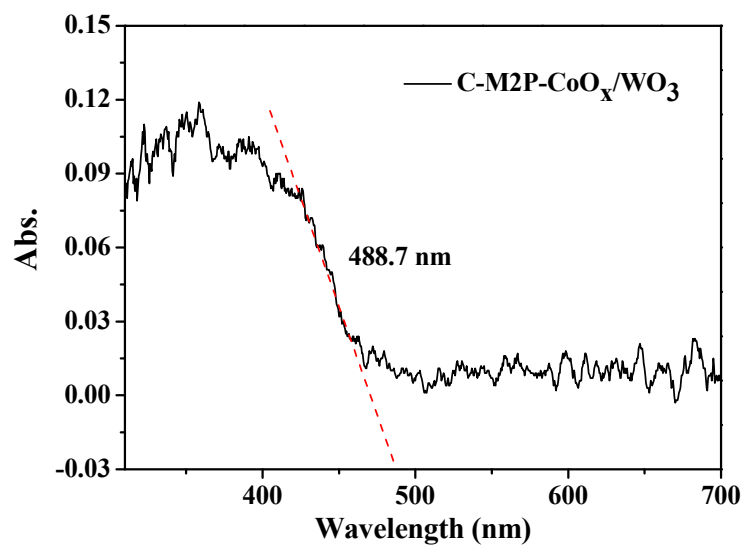

Figure S3. the UV-vis DRS of (a)  $\text{WO}_3$  and (b)  $\text{C-M2P-CoO}_x/\text{WO}_3$  films.

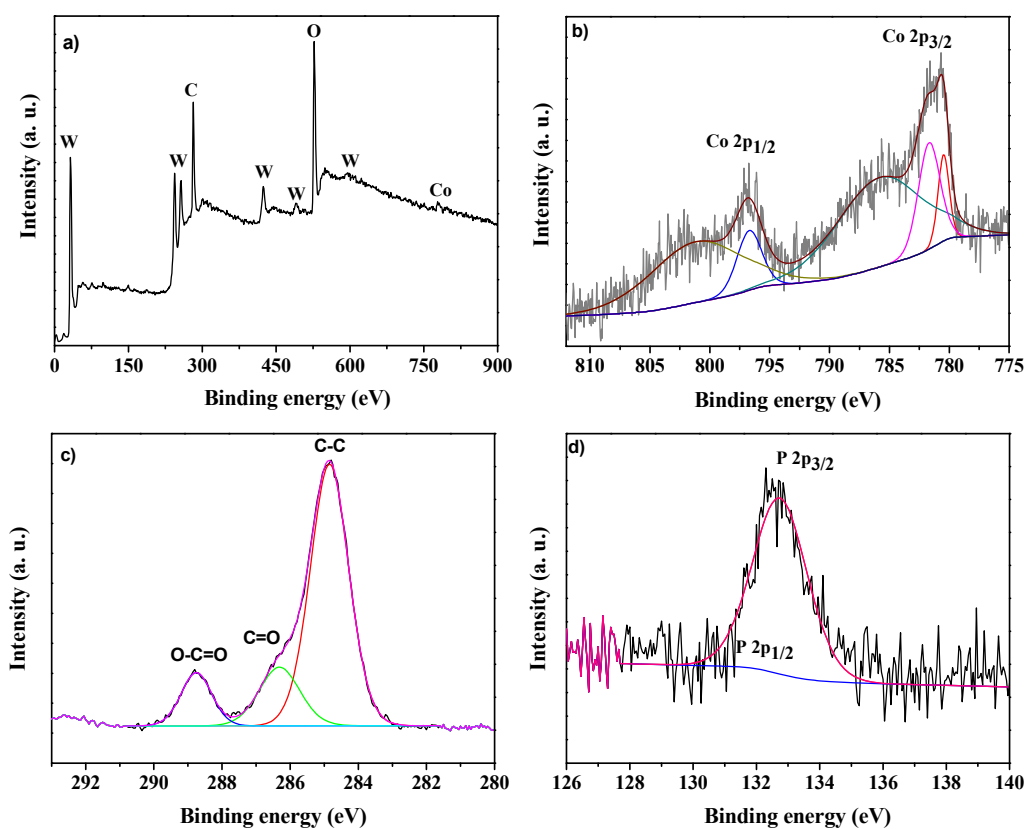

**Figure S4.** a) the XPS full scan and fine scan of b) Co, c) C and d) P on C-M2P-CoO<sub>x</sub>/WO<sub>3</sub> films after 2 h photoelectrolysis.

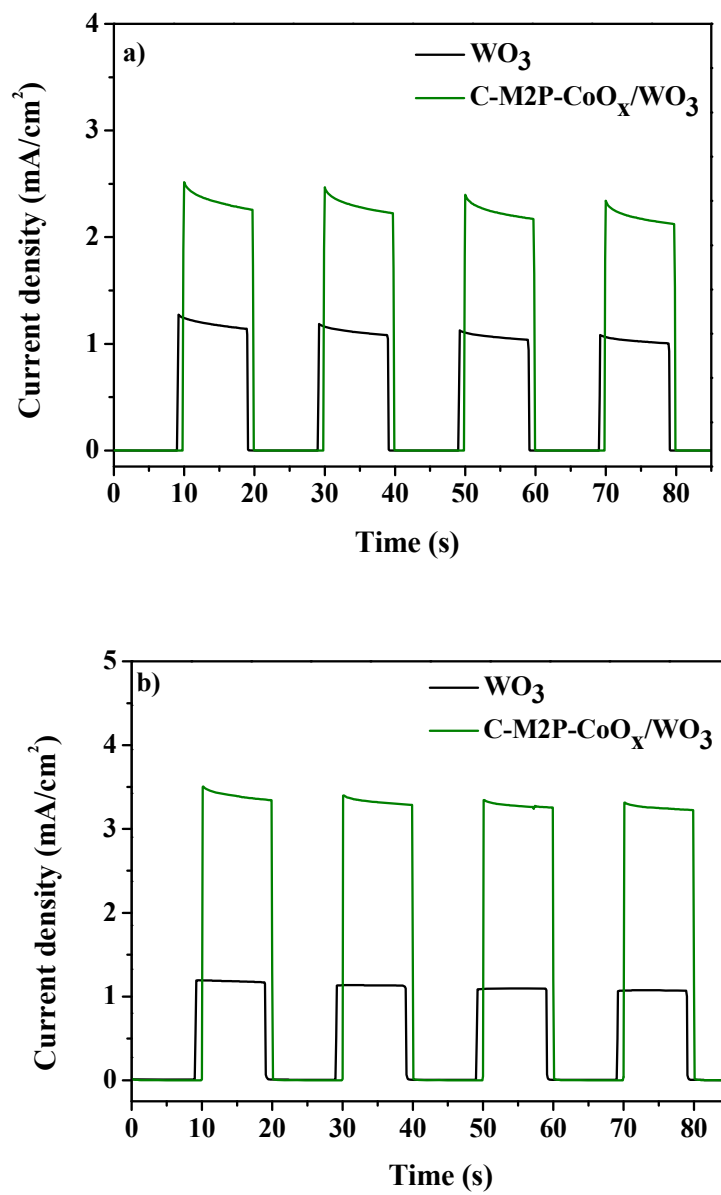

**Figure S5.** the photoelectrochemical behavior based on  $\text{C-M2P-CoO}_x/\text{WO}_3$  electrode when applied different external bias at (a) 0.75 V and (b) 1.23 V under illumination by LEDs ( $\lambda = 400$  nm).

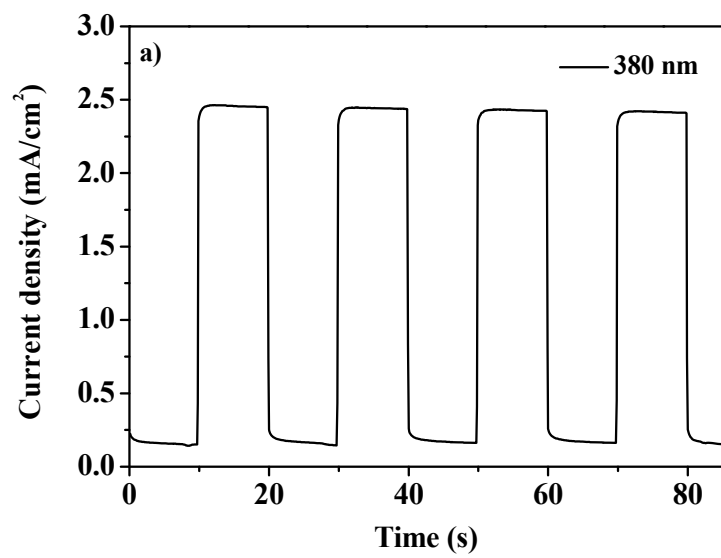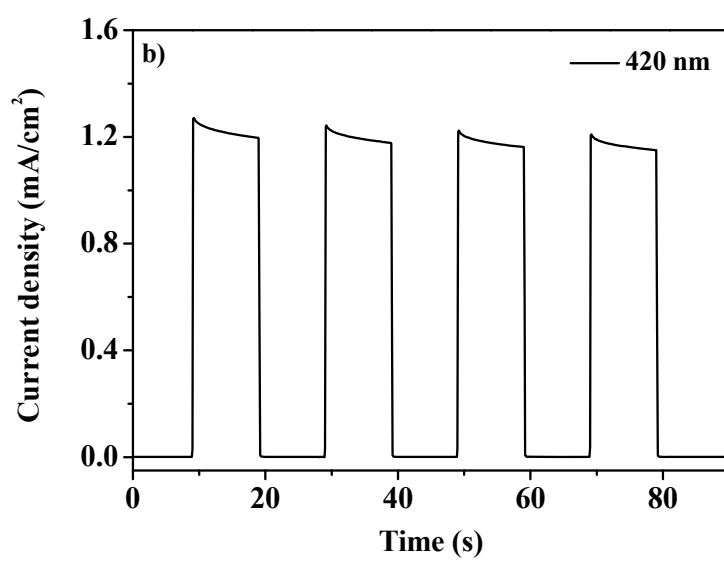

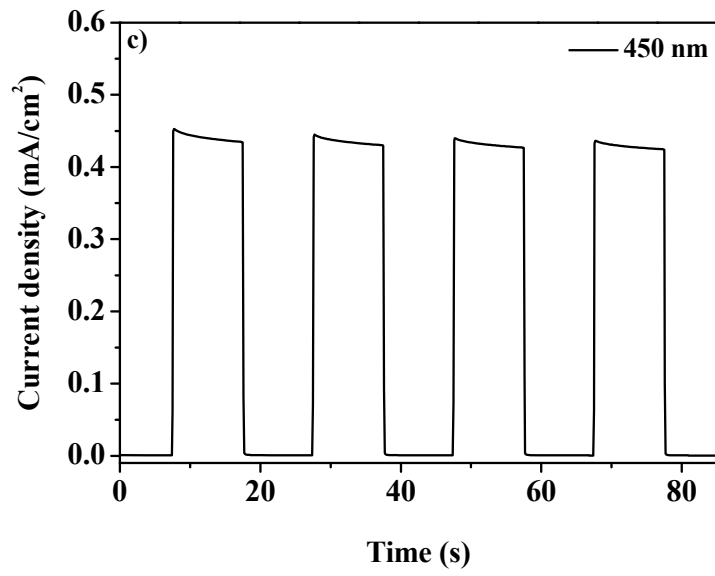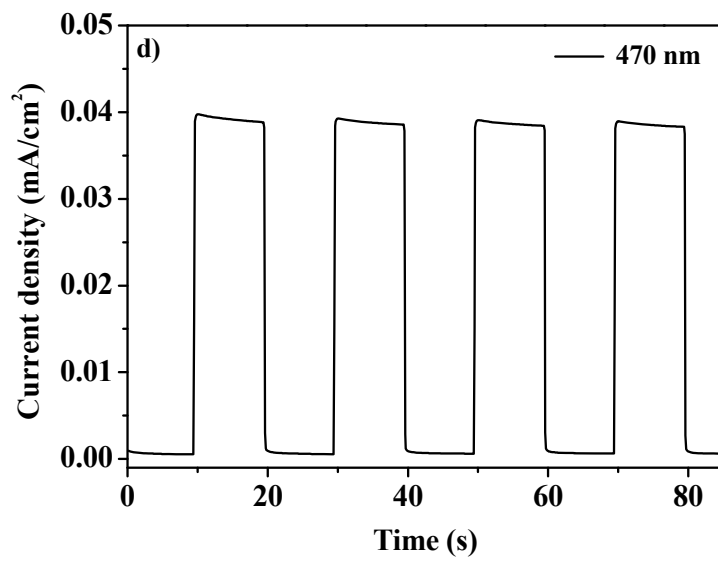

**Figure S6.** photocurrent densities based on C-M2P-CoO<sub>x</sub>/WO<sub>3</sub> electrode under illumination by LEDs with  $\lambda$  (a) at 380 nm, (b) at 420 nm, (c) at 450 nm and (d) at 470 nm when applied 0.75 V external bias.



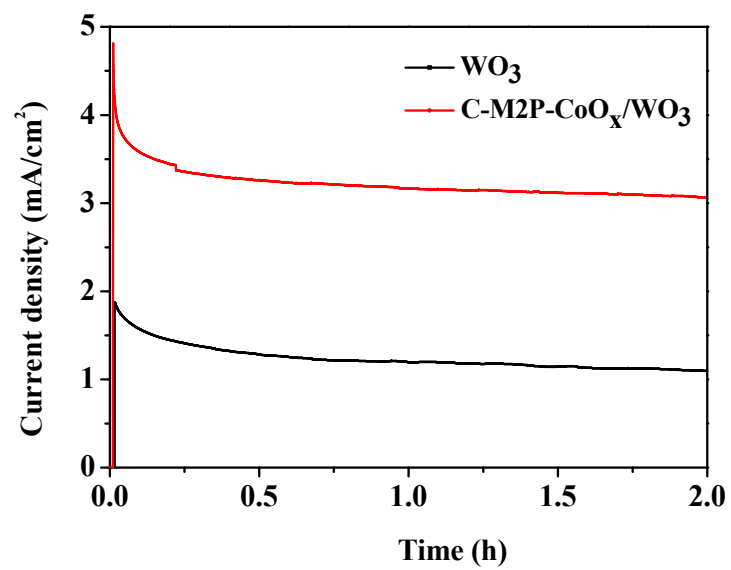

**Figure S7.** The controlled-potential electrolysis of water oxidation based on C-M2P-CoO<sub>x</sub>/WO<sub>3</sub> electrode at 1.23 V under continued visible-light irradiation ( $\lambda = 400$  nm).

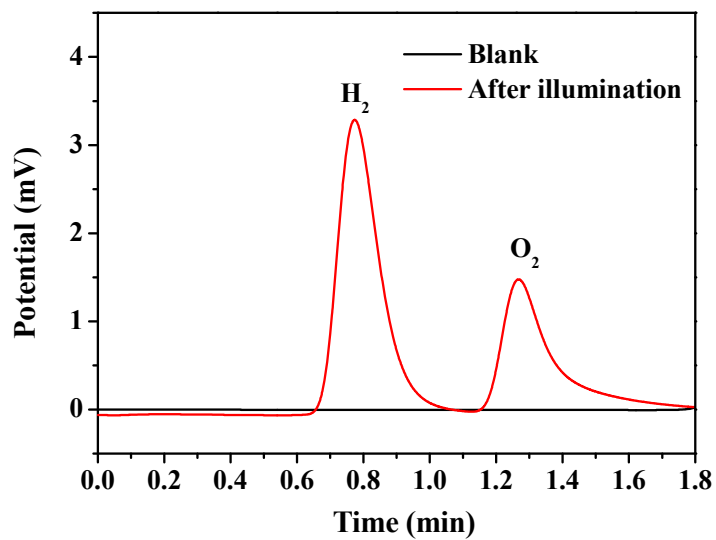

**Figure S8.** The detection of hydrogen and oxygen by GC based on C-M2P-CoO<sub>x</sub>/WO<sub>3</sub> electrode after photoelectrolysis at 0.75 V under continued visible-light irradiation ( $\lambda = 400$  nm). finite.

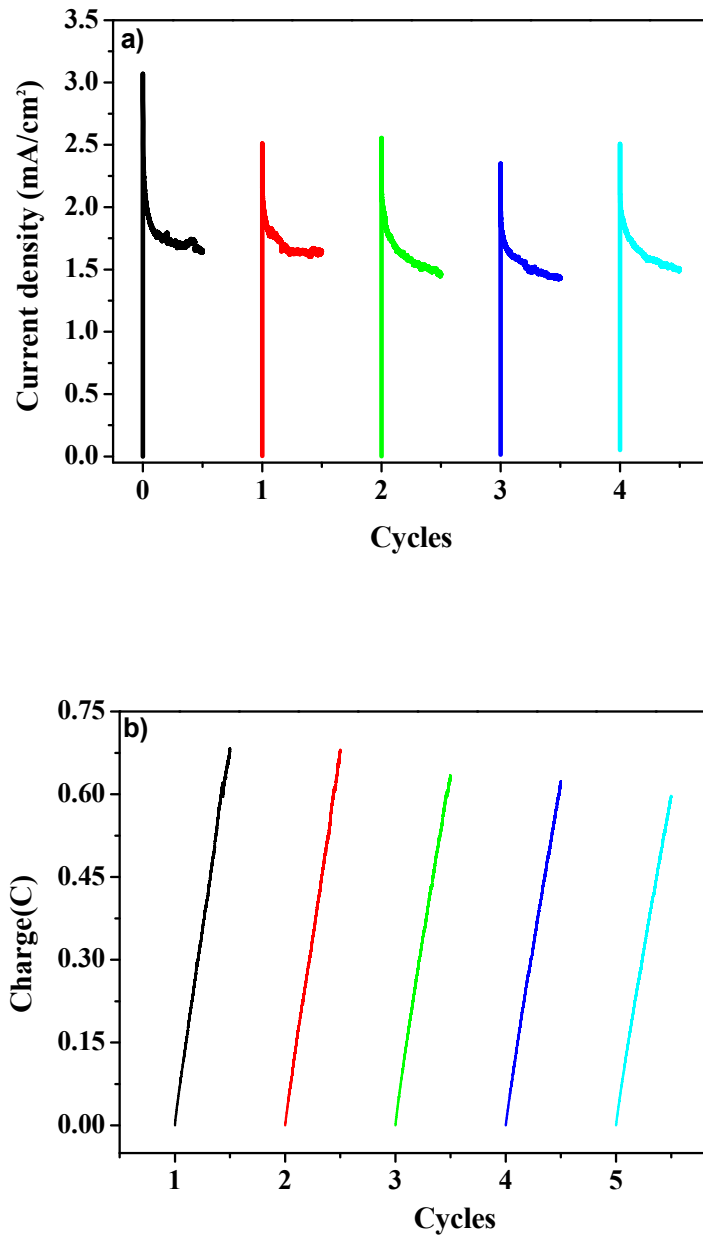

**Figure S9.** a) C-M2P-CoO<sub>x</sub>/WO<sub>3</sub> electrode reused for bulk photoelectrolysis and performed for five cycles with 0.75V bias; b) the produced charge under continued visible-light irradiation ( $\lambda = 400$  nm).

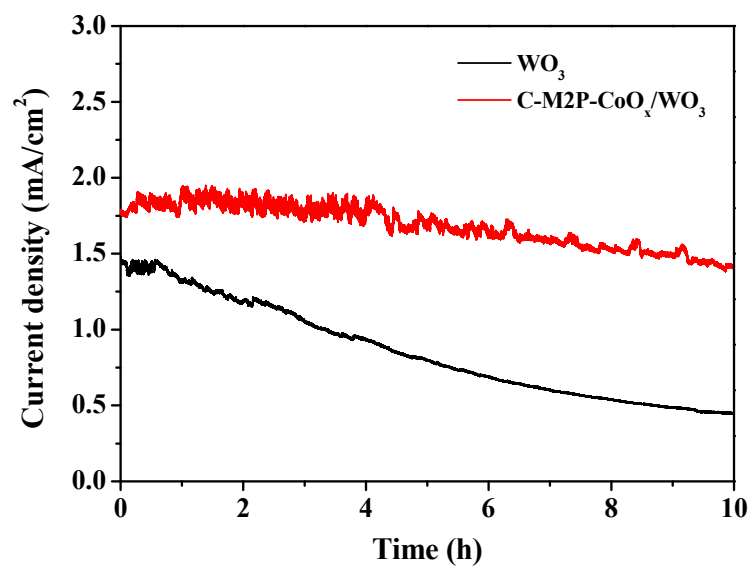

**Figure S10.** Controlled-potential electrolysis of water oxidation based on WO<sub>3</sub> and C-M2P-CoO<sub>x</sub>/WO<sub>3</sub> for 10 h under continued visible-light irradiation ( $\lambda = 400$  nm) with the bias at 0.75 V.

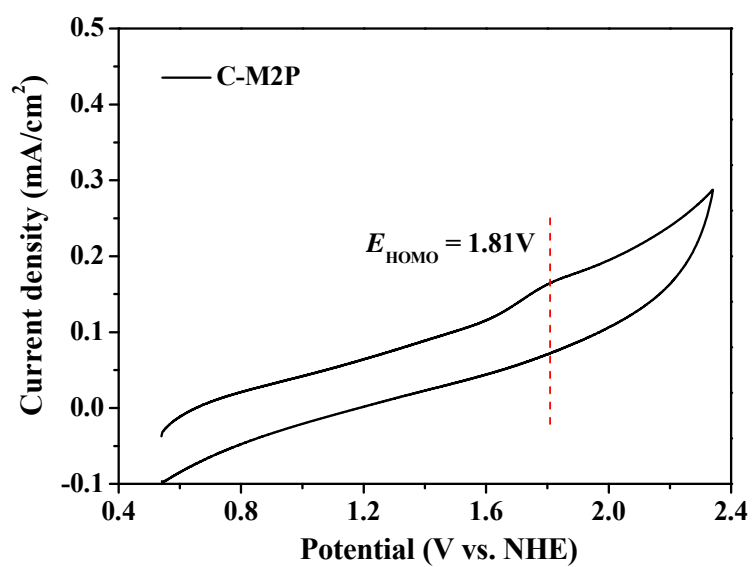

Figure S11. HOMO level measured based on CV of C-M2P vs. NHE. <sup>[1]</sup>

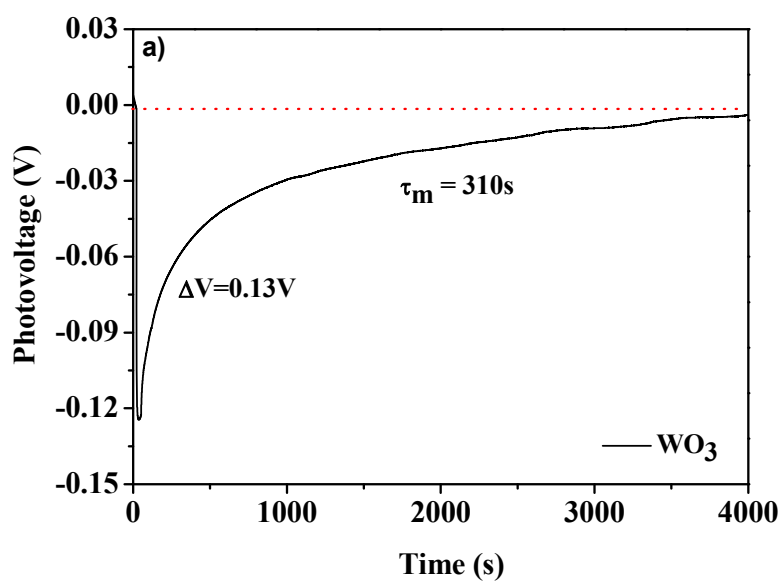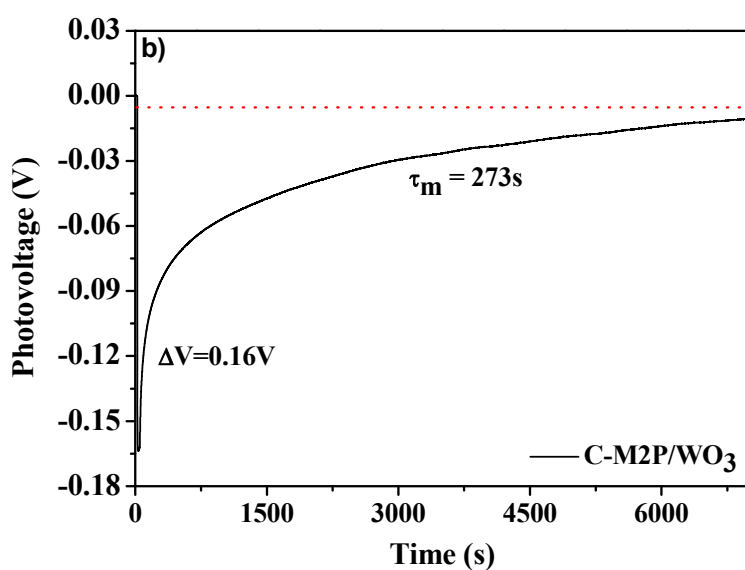

**Figure S12.** OCVD plots of (a)  $\text{WO}_3$ , (b) C-M2P/ $\text{WO}_3$  photoanode with 400 nm LED lamp illumination from the electrolyte-electrode side ( $\Delta V$  is the difference in voltage between dark and illumination conditions,  $\tau_m$  is the decay lifetime).

It is noted that the measurement here operated for the complete charge decay of the  $\text{WO}_3$ , and C-M2P/ $\text{WO}_3$  photoelectrode. The differences in  $\Delta V$  compared with Fig. 7 might be originated from the experimental error. However, the decay trend among  $\text{WO}_3$ , C-M2P/ $\text{WO}_3$  and C-M2P- $\text{CoO}_x$ / $\text{WO}_3$  is clearly sustained.

### **The calculation for $E_{CB}$ and $E_{VB}$ for $WO_3$ film.**

In general, a simple method can be applied to determine the band edge positions of CB and VB of a semiconductor respectively. The CB edge of a semiconductor at zero charge ( $pH_{zpc}$ ) can be figured up using the following equation S1-2. [2]

$$E_{CB} = \chi - E^e - 1/2 E_g \quad (1)$$

$$E_{VB} = E_g + E_{CB} \quad (2)$$

where  $E_{CB}$  is the CB edge potential,  $E_{VB}$  is the VB edge potential, and  $\chi$  is the electronegativity of the semiconductor, expressed as the geometric mean of the absolute electronegativity of the constituent atoms, which is defined as the arithmetic mean of the atomic electron affinity and the first ionization energy.  $E^e$  is the energy of free electrons on the hydrogen scale, about equal to 4.5 eV.

**The calculation for carrier densities  $N_d$  of C-M2P-CoO<sub>x</sub>/WO<sub>3</sub> electrode.**

The carrier densities of the prepared C-M2P-CoO<sub>x</sub>/WO<sub>3</sub> electrode could be estimated using the Mott-Schottky equation. [3]

$$1/C^2 = (2/e_0\epsilon\epsilon_0N_d)[(V - V_{FB}) - kT/e_0] \quad (3)$$

Where  $C$  is the specific capacitance (F cm<sup>-2</sup>),  $e_0$  is the electron charge,  $\epsilon$  is the dielectric constant of WO<sub>3</sub> ( $\epsilon = 20$ ),  $\epsilon_0$  represents the permittivity of vacuum,  $N_d$  is the carrier density,  $V$  is the electrode applied potential,  $V_{FB}$  is the flatband potential and  $kT/e_0$  is a temperature-dependent correction term.



**ABPE measurement** <sup>[4]</sup>

The applied bias photon-to-current efficiency (ABPE) was calculated from the LSV using the equation:

$$\text{ABPE}(\%) = \frac{(J_{\text{light}} - J_{\text{dark}}) \times (1.23 - V_{\text{RHE}})}{P_{\text{light}}} \times 100\% \quad (4)$$

Where  $V_{\text{RHE}}$  is the applied potential versus RHE,  $J_{\text{light}}$  and  $J_{\text{dark}}$  are the measured photocurrent and dark current respectively, and  $P_{\text{light}}$  ( $\text{mW cm}^{-2}$ ) represents the power density.

**IPCE measurement** <sup>[5]</sup>

IPCE measurement was carried out in a three-electrode setup with the assembled- electrode as the working electrode, platinum disk as counter electrode, and Ag/AgCl (3.0 M KCl) as reference electrode. IPCE was calculated according to equation:

$$\text{IPCE}(\%) = \frac{1240 \times J}{\lambda \times I} \times 100\% \quad (5)$$

Where,  $J$  represents the photocurrent density ( $\text{mA cm}^{-2}$ ),  $\lambda$  is the wavelength of incident light (nm), and  $I$  is the intensity of the incident light ( $\text{mW cm}^{-2}$ ).

**The calculation for the lifetime  $\tau_m$  based on Open circuit voltage decay (OCVD) plots.**<sup>[6]</sup>

The calculated decay lifetime of each V-t profiles by fitting to a biexponential function with two time constants:

$$y(t) = A_0 + A_1 e^{-t/\tau_1} + A_2 e^{-t/\tau_2} \quad (6)$$

$$\tau_m = (\tau_1 \tau_2) / (\tau_1 + \tau_2) \quad (7)$$

where  $\tau_m$  is the harmonic mean of the lifetime and the total half life is  $\log(2 \times \tau_m)$ .

## Supporting References

- [1] J. Volker, X. Zhou, X. Ma, S. Flessau, H. Lin, M. Schmittl, A. Mews, Semiconductor Nanocrystals with Adjustable Hole Acceptors: Tuning the Fluorescence Intensity by Metal-Ion Binding, *Angew. Chem. Int. Ed.* 49 (2010) 6865-6868.
- [2] a) J. Huang, Y. Zhang, Y. Ding, Rationally Designed/Constructed  $\text{CoO}_x/\text{WO}_3$  Anode for Efficient Photoelectrochemical Water Oxidation, *ACS Catal.* 7 (2017) 1841-1845; b) Y. Xu, M. A. Schoonen, The absolute energy positions of conduction and valence bands of selected semiconducting minerals, *Am. Mineral.* 85 (2000) 543-556.
- [3] T. Zhang, Z. Zhu, H. Chen, Y. Bai, S. Xiao, X. Zheng, Q. Xue, S. Yang, Iron-doping-enhanced photoelectrochemical water splitting performance of nanostructured  $\text{WO}_3$ : a combined experimental and theoretical study, *Nanoscale* 7 (2015) 2933-2940.
- [4] S. Berardi, G. L. Ganga, M. Natali, I. Bazzan, F. Puntoriero, A. Sartorel, F. Scandola, S. Campagna, M. Bonchio, Photocatalytic Water Oxidation: Tuning Light-Induced Electron Transfer by Molecular  $\text{Co}_4\text{O}_4$  Cores, *J. Am. Chem. Soc.* 134 (2012) 11104-11107.
- [5] A. Nattestad, A. J. Mozer, A. M. K. Fischer, C. A. Mishra, P. Bauerle, U. Bach, Highly efficient photocathodes for dye-sensitized tandem solar cells, *Nat. Mater.* 9 (2010) 31-35.
- [6] a) Q. Ruan, M. K. Bayazit, V. Kiran, J. Xie, Y. Wang, J. Tang, Key factors affecting photoelectrochemical performance of g- $\text{C}_3\text{N}_4$  polymer films, *Chem. Commun.* 55 (2019) 7191-7194; b) Y. C. Pu, G. Wang, K. D. Chang, Y. Ling, Y. K. Lin, B. C. Fitzmorris, C. M. Liu, X. Lu, Y. Tong, J. Z. Zhang, Y. J. Hsu, Y. Li, Au Nanostructure-Decorated  $\text{TiO}_2$  Nanowires Exhibiting Photoactivity Across Entire UV-visible Region for Photoelectrochemical Water Splitting, *Nano Lett.* 13 (2013) 3817-3823; c) W. Liu, L. Cao, W. Cheng, Y. Cao, X. Liu, W. Zhang, X. Mou, L. Jin, X. Zheng, W. Che, Q. Liu, T. Yao, S. Wei, Single-Site Active Cobalt-Based Photocatalyst with a Long Carrier Lifetime for Spontaneous Overall Water Splitting, *Angew. Chem. Int. Ed.* 56 (2017) 9312-9317.

End of Supporting Information
